# Supplementary material for: In vivo proteomics identifies the competence regulon and AliB oligopeptide transporter as pathogenic factors in pneumococcal meningitis
Source: PubMed Central journal article supplement (PMC6687184; doi:10.1371/journal.ppat.1007987), 2019-07-29
Supplement: ppat.1007987.s004.pdf [file ppat.1007987.s004.pdf]

**Table S1:** Proteins with differential abundance between *S.p.* D39 $\Delta$ *comDE* or *S.p.* D39 $\Delta$ *aliB* strains and the wild-type strain. Proteins with a p-value of 0.05 or less and an absolute fold change of at least 1.5 were regarded as significantly regulated. Furthermore, proteins, which were quantified in all replicates of one condition and not detected in all replicates of the comparison condition (mutant or wt, early or mid-exponential phase), were classified as regulated with an on-off effect. In addition, less stringent criteria, which allowed the quantification of a protein in one of four replicates in one condition while requiring quantification in all replicates of the other condition and an absolute fold change of at least 2, were applied for further defining on-off regulated proteins.

**a.** Regulated proteins (n=24) in the comparison of *S.p.* D39 $\Delta$ *comDE* strain and *S.p.* D39 wild-type strain in early exponential growth phase.

| identifier             | gene         | description                                                                                   | $\Delta$ <i>comDE</i> vs. wt |                    |                       |                    | $\Delta$ <i>aliB</i> vs. wt |                    |                       |                    |
|------------------------|--------------|-----------------------------------------------------------------------------------------------|------------------------------|--------------------|-----------------------|--------------------|-----------------------------|--------------------|-----------------------|--------------------|
|                        |              |                                                                                               | early exp. growth phase      |                    | mid-exp. growth phase |                    | early exp. growth phase     |                    | mid-exp. growth phase |                    |
|                        |              |                                                                                               | fold change                  | sign. <sup>a</sup> | fold change           | sign. <sup>a</sup> | fold change                 | sign. <sup>a</sup> | fold change           | sign. <sup>a</sup> |
| spd_0102   spd_rs00535 | <i>sdhA</i>  | L-serine dehydratase, iron-sulfur-dependent subunit alpha (EC:4.3.1.17)                       | 1.56                         | s.                 | 1.13                  | n.s.               | 1.13                        | n.s.               | 1.41                  | N/A                |
| spd_0114   spd_rs00600 | namex 120    | hypothetical protein                                                                          | -4.09                        | off                | 1.17                  | n.s.               | N/A                         | off                | -3.30                 | N/A                |
| spd_0115   spd_rs00605 | namex 121    | hypothetical protein                                                                          | -2.70                        | off                | 1.01                  | n.s.               | N/A                         | off                | N/A                   | off                |
| spd_0203   spd_rs01095 | <i>rplN</i>  | 5S ribosomal protein L14                                                                      | 1.55                         | s.                 | 1.30                  | s.                 | 1.14                        | n.s.               | 1.15                  | n.s.               |
| spd_0308   spd_rs01645 | <i>clpL</i>  | ATP-dependent Clp protease, ATP-binding subunit                                               | 1.69                         | s.                 | 1.54                  | s.                 | 1.76                        | s.                 | 2.72                  | s.                 |
| spd_0489   spd_rs02610 | namex 520    | hypothetical protein                                                                          | 1.50                         | s.                 | 1.20                  | N/A                | 1.19                        | n.s.               | -1.03                 | n.s.               |
| spd_0608   spd_rs03250 | <i>pyrF</i>  | orotidine 5-phosphate decarboxylase (EC:4.1.1.23)                                             | 2.78                         | s.                 | 1.28                  | N/A                | 2.08                        | n.s.               | 1.23                  | n.s.               |
| spd_0609   spd_rs03255 | <i>pyrE</i>  | orotate phosphoribosyl-transferase (EC:2.4.2.1)                                               | 1.99                         | s.                 | -1.15                 | n.s.               | 1.36                        | n.s.               | 1.01                  | n.s.               |
| spd_0696   spd_rs03690 | namex 735    | MutT/nudix family protein                                                                     | N/A                          | on                 | 1.09                  | N/A                | N/A                         | on                 | 1.23                  | N/A                |
| spd_0852   spd_rs04545 | <i>pyrDb</i> | dihydroorotate dehydrogenase 1B (EC:1.3.98.1)                                                 | 2.65                         | s.                 | -1.01                 | n.s.               | 2.03                        | n.s.               | 1.02                  | n.s.               |
| spd_1131   spd_rs05980 | <i>carB</i>  | carbamoyl phosphate synthase large subunit (EC:6.3.5.5)                                       | 2.35                         | s.                 | 1.09                  | n.s.               | 1.71                        | n.s.               | 1.16                  | n.s.               |
| spd_1133   spd_rs05990 | <i>pyrB</i>  | aspartate carbamoyl-transferase catalytic subunit (EC:2.1.3.2)                                | 1.99                         | s.                 | 1.18                  | n.s.               | 1.59                        | n.s.               | 1.17                  | s.                 |
| spd_1134   spd_rs05995 | <i>pyrR</i>  | bifunctional pyrimidine regulatory protein PyrR/uracil phosphoribosyltransferase (EC:2.4.2.9) | 1.87                         | s.                 | 1.29                  | n.s.               | 1.64                        | s.                 | 1.21                  | n.s.               |
| spd_1334   spd_rs07025 | <i>atpC</i>  | FF1 ATP synthase subunit epsilon (EC:3.6.3.14)                                                | 1.55                         | s.                 | 1.13                  | n.s.               | 1.29                        | s.                 | -1.12                 | n.s.               |
| spd_1485   spd_rs07835 | <i>recR</i>  | recombination protein RecR                                                                    | N/A                          | on                 | 1.46                  | N/A                | N/A                         | N/A                | 1.25                  | N/A                |
| spd_1667   spd_rs08820 | <i>amiF</i>  | oligopeptide ABC transporter ATP-binding protein AmiF                                         | -1.53                        | s.                 | -1.50                 | s.                 | -1.59                       | s.                 | -1.27                 | s.                 |
| spd_1668   spd_rs08825 | <i>amiE</i>  | oligopeptide ABC transporter ATP-binding protein AmiE                                         | -1.82                        | s.                 | -1.95                 | s.                 | -1.92                       | s.                 | -1.74                 | s.                 |
| spd_1669   spd_rs08830 | <i>amiD</i>  | oligopeptide ABC transporter permease AmiD                                                    | -2.92                        | s.                 | -2.93                 | s.                 | -2.04                       | s.                 | -1.97                 | s.                 |

|                           |               |                                                  |              |            |       |      |       |      |       |      |
|---------------------------|---------------|--------------------------------------------------|--------------|------------|-------|------|-------|------|-------|------|
| spd_1670  <br>spd_rs08835 | <i>amiC</i>   | oligopeptide ABC<br>transporter permease<br>AmiC | <b>-2.83</b> | <b>s.</b>  | -3.16 | s.   | -2.42 | s.   | -2.43 | s.   |
| spd_1793  <br>spd_rs09475 | namex<br>1888 | universal stress<br>protein family protein       | <b>1.76</b>  | <b>s.</b>  | 1.30  | n.s. | -1.19 | n.s. | 1.28  | n.s. |
| spd_1848  <br>spd_rs09755 | namex<br>1944 | hypothetical protein                             | <b>1.52</b>  | <b>s.</b>  | 1.13  | n.s. | 1.16  | n.s. | 1.19  | N/A  |
| spd_1908  <br>spd_rs10050 | <i>rr4</i>    | response regulator                               | <b>1.67</b>  | <b>s.</b>  | 1.35  | n.s. | 1.41  | n.s. | 1.30  | n.s. |
| spd_2000  <br>spd_rs10505 | <i>adcR</i>   | adc operon repressor<br>AdcR                     | <b>N/A</b>   | <b>on</b>  | 1.30  | n.s. | N/A   | N/A  | 1.41  | n.s. |
| spd_2063  <br>spd_rs10830 | <i>comE</i>   | response regulator<br>ComE                       | <b>N/A</b>   | <b>off</b> | N/A   | off  | -1.02 | 0.83 | 17.05 | n.s. |

<sup>a</sup> significance level or on-off effect (s. – significant with  $p \leq 0.05$ ; n.s. – not significant with  $p > 0.05$ ; N/A – p-value not available; on – on-off effect: quantified only in mutant; off – on-off effect: not quantified in mutant)  
Because of missing intensity values in the proteomics data set, not all fold change values could be calculated. Those are indicated by „N/A“.

**b. Regulated proteins (n=11) in the comparison of *S.p.* D39 $\Delta$ *comDE* strain and *S.p.* D39 wild-type strain in mid-exponential growth phase.**

| identifier                | gene          | description                                                             | <i>ΔcomDE vs. wt</i>       |                    |                          |                    | <i>ΔaliB vs. wt</i>        |                    |                          |                    |
|---------------------------|---------------|-------------------------------------------------------------------------|----------------------------|--------------------|--------------------------|--------------------|----------------------------|--------------------|--------------------------|--------------------|
|                           |               |                                                                         | early exp.<br>growth phase |                    | mid-exp. growth<br>phase |                    | early exp.<br>growth phase |                    | mid-exp. growth<br>phase |                    |
|                           |               |                                                                         | fold<br>change             | sign. <sup>a</sup> | fold<br>change           | sign. <sup>a</sup> | fold<br>change             | sign. <sup>a</sup> | fold<br>change           | sign. <sup>a</sup> |
| spd_0308  <br>spd_rs01645 | <i>clpL</i>   | ATP-dependent Clp<br>protease, ATP-binding<br>subunit                   | 1.69                       | s.                 | <b>1.54</b>              | <b>s.</b>          | 1.76                       | s.                 | 2.72                     | s.                 |
| spd_0697  <br>spd_rs03695 | namex<br>736  | GNAT family<br>acetyltransferase                                        | N/A                        | N/A                | <b>N/A</b>               | <b>on</b>          | N/A                        | N/A                | N/A                      | on                 |
| spd_0989  <br>spd_rs05280 | <i>rplU</i>   | 5S ribosomal protein<br>L21                                             | 1.40                       | s.                 | <b>1.53</b>              | <b>s.</b>          | 1.13                       | n.s.               | 1.24                     | n.s.               |
| spd_1621  <br>spd_rs08570 | namex<br>1707 | ABC transporter ATP-<br>binding protein/<br>permease                    | -1.17                      | s.                 | <b>-1.66</b>             | <b>s.</b>          | 1.04                       | n.s.               | -1.10                    | n.s.               |
| spd_1622  <br>spd_rs08575 | namex<br>1708 | ABC transporter ATP-<br>binding protein/<br>permease                    | -1.07                      | n.s.               | <b>-1.51</b>             | <b>s.</b>          | 1.09                       | n.s.               | -1.13                    | n.s.               |
| spd_1668  <br>spd_rs08825 | <i>amiE</i>   | oligopeptide ABC<br>transporter ATP-<br>binding protein AmiE            | -1.82                      | s.                 | <b>-1.95</b>             | <b>s.</b>          | -1.92                      | s.                 | -1.74                    | s.                 |
| spd_1669  <br>spd_rs08830 | <i>amiD</i>   | oligopeptide ABC<br>transporter permease<br>AmiD                        | -2.92                      | s.                 | <b>-2.93</b>             | <b>s.</b>          | -2.04                      | s.                 | -1.97                    | s.                 |
| spd_1670  <br>spd_rs08835 | <i>amiC</i>   | oligopeptide ABC<br>transporter permease<br>AmiC                        | -2.83                      | s.                 | <b>-3.16</b>             | <b>s.</b>          | -2.42                      | s.                 | -2.43                    | s.                 |
| spd_1671  <br>spd_rs08840 | <i>amiA</i>   | oligopeptide ABC<br>transporter<br>oligopeptide-binding<br>protein AmiA | -959.64                    | off                | <b>N/A</b>               | <b>off</b>         | -2036.0                    | off                | N/A                      | off                |
| spd_1900  <br>spd_rs10010 | namex<br>1995 | ABC transporter ATP-<br>binding protein/<br>permease                    | -1.03                      | n.s.               | <b>-1.52</b>             | <b>s.</b>          | 1.05                       | n.s.               | -1.20                    | n.s.               |
| spd_2063  <br>spd_rs10830 | <i>comE</i>   | response regulator<br>ComE                                              | N/A                        | off                | <b>N/A</b>               | <b>off</b>         | -1.02                      | n.s.               | 17.05                    | n.s.               |

<sup>a</sup> significance level or on-off effect (s. – significant with  $p \leq 0.05$ ; n.s. – not significant with  $p > 0.05$ ; N/A – p-value not available; on – on-off effect: quantified only in mutant; off – on-off effect: not quantified in mutant)  
Because of missing intensity values in the proteomics data set, not all fold change values could be calculated. Those are indicated by „N/A“.

**c.** Regulated proteins (n=33) in the comparison of *S.p.* D39 $\Delta$ *aliB* strain and *S.p.* D39 wild-type strain in early exponential growth phase.

| identifier             | gene          | description                                                                                             | $\Delta$ <i>comDE</i> vs. wt |                    |                       |                    | <i>aliB</i> vs. wt      |                    |                       |                    |
|------------------------|---------------|---------------------------------------------------------------------------------------------------------|------------------------------|--------------------|-----------------------|--------------------|-------------------------|--------------------|-----------------------|--------------------|
|                        |               |                                                                                                         | early exp. growth phase      |                    | mid-exp. growth phase |                    | early exp. growth phase |                    | mid-exp. growth phase |                    |
|                        |               |                                                                                                         | fold change                  | sign. <sup>a</sup> | fold change           | sign. <sup>a</sup> | fold change             | sign. <sup>a</sup> | fold change           | sign. <sup>a</sup> |
| spd_0052   spd_rs00280 | namex 56      | phosphoribosylformyl-glycinamide synthase (EC:6.3.5.3)                                                  | -2.43                        | n.s.               | -1.14                 | n.s.               | <b>-3.83</b>            | <b>s.</b>          | -1.75                 | n.s.               |
| spd_0059   spd_rs00315 | <i>purE</i>   | phosphoribosylaminoimidazole carboxylase catalytic subunit (EC:4.1.1.21)                                | -1.35                        | n.s.               | 1.28                  | n.s.               | <b>-2.35</b>            | <b>s.</b>          | -1.23                 | n.s.               |
| spd_0109   spd_rs00570 | namex 114     | amino acid ABC transporter periplasmic amino acid-binding protein                                       | N/A                          | N/A                | N/A                   | N/A                | <b>363.52</b>           | <b>on</b>          | N/A                   | on                 |
| spd_0110   spd_rs00575 | <i>argG</i>   | argininosuccinate synthase (EC:6.3.4.5)                                                                 | N/A                          | N/A                | N/A                   | N/A                | <b>N/A</b>              | <b>on</b>          | N/A                   | on                 |
| spd_0111   spd_rs00580 | <i>argH</i>   | argininosuccinate lyase (EC:4.3.2.1)                                                                    | N/A                          | N/A                | N/A                   | N/A                | <b>N/A</b>              | <b>on</b>          | N/A                   | on                 |
| spd_0114   spd_rs00600 | namex 120     | hypothetical protein                                                                                    | -4.09                        | off                | 1.17                  | n.s.               | <b>N/A</b>              | <b>off</b>         | -3.30                 | #NV                |
| spd_0115   spd_rs00605 | namex 121     | hypothetical protein                                                                                    | -2.70                        | off                | 1.01                  | n.s.               | <b>N/A</b>              | <b>off</b>         | N/A                   | off                |
| spd_0260   spd_rs01390 | <i>rsuA-1</i> | ribosomal small subunit pseudouridine synthase A                                                        | 1.15                         | n.s.               | 1.02                  | N/A                | <b>N/A</b>              | <b>off</b>         | -1.06                 | N/A                |
| spd_0308   spd_rs01645 | <i>clpL</i>   | ATP-dependent Clp protease, ATP-binding subunit                                                         | 1.69                         | s.                 | 1.54                  | s.                 | <b>1.76</b>             | <b>s.</b>          | 2.72                  | s.                 |
| spd_0661   spd_rs03520 | <i>exp5</i>   | PTS system transporter subunit IIABC (EC:2.7.1.69)                                                      | 1.02                         | n.s.               | -1.72                 | n.s.               | <b>2.14</b>             | <b>s.</b>          | 2.39                  | s.                 |
| spd_0696   spd_rs03690 | namex 735     | MutT/nudix family protein                                                                               | N/A                          | on                 | 1.09                  | N/A                | <b>N/A</b>              | <b>on</b>          | 1.23                  | N/A                |
| spd_0719   spd_rs03805 | namex 758     | amino acid ABC transporter permease                                                                     | 1.04                         | n.s.               | -1.29                 | n.s.               | <b>1.91</b>             | <b>s.</b>          | 1.76                  | s.                 |
| spd_0721   spd_rs03815 | <i>folD</i>   | bifunctional 5,1-methylene-tetrahydrofolate dehydrogenase/5,1-methylene-tetrahydrofolate cyclohydrolase | -1.08                        | n.s.               | -1.13                 | n.s.               | <b>1.76</b>             | <b>s.</b>          | 1.82                  | s.                 |
| spd_0722   spd_rs03820 | namex 761     | YjeF-like protein                                                                                       | N/A                          | N/A                | -1.24                 | N/A                | <b>N/A</b>              | <b>on</b>          | 1.22                  | N/A                |
| spd_0981   spd_rs05230 | namex 1042    | hypothetical protein                                                                                    | N/A                          | N/A                | N/A                   | N/A                | <b>N/A</b>              | <b>on</b>          | N/A                   | N/A                |
| spd_1037   spd_rs05515 | namex 1099    | histidine triad protein                                                                                 | -1.48                        | n.s.               | -1.16                 | n.s.               | <b>1.61</b>             | <b>s.</b>          | 1.03                  | n.s.               |
| spd_1134   spd_rs05995 | <i>pyrR</i>   | bifunctional pyrimidine regulatory protein PyrR/ uracil phosphoribosyltransferase (EC:2.4.2.9)          | 1.87                         | s.                 | 1.29                  | n.s.               | <b>1.64</b>             | <b>s.</b>          | 1.21                  | n.s.               |
| spd_1226   spd_rs06470 | namex 1289    | amino acid ABC transporter amino acid-binding protein                                                   | -1.07                        | n.s.               | -1.18                 | n.s.               | <b>4.50</b>             | <b>s.</b>          | 3.73                  | s.                 |
| spd_1357   spd_rs07140 | <i>aliB</i>   | oligopeptide ABC transporter oligopeptide-binding protein AliB                                          | -1.11                        | 0.57               | -1.06                 | n.s.               | <b>N/A</b>              | <b>off</b>         | N/A                   | off                |
| spd_1518   spd_rs08005 | namex 1595    | transcriptional activator, Rgg/GadR/MutR family protein                                                 | -1.19                        | n.s.               | -1.03                 | n.s.               | <b>-2.16</b>            | <b>s.</b>          | 1.05                  | n.s.               |
| spd_1607   spd_rs08500 | namex 1693    | ABC transporter permease                                                                                | N/A                          | N/A                | N/A                   | N/A                | <b>N/A</b>              | <b>on</b>          | N/A                   | on                 |
| spd_1608   spd_rs08505 | namex 1694    | ABC transporter ATP-binding protein                                                                     | 1.22                         | n.s.               | -1.07                 | n.s.               | <b>32.20</b>            | <b>s.</b>          | 54.44                 | s.                 |

|                           |               |                                                                         |         |      |       |      |                |            |        |      |
|---------------------------|---------------|-------------------------------------------------------------------------|---------|------|-------|------|----------------|------------|--------|------|
| spd_1609  <br>spd_rs08510 | namex<br>1695 | ABC transporter<br>substrate-binding<br>protein                         | 1.54    | n.s. | 1.17  | n.s. | <b>38.40</b>   | <b>s.</b>  | 107.54 | s.   |
| spd_1610  <br>spd_rs08515 | namex<br>1696 | hypothetical protein                                                    | 1.37    | n.s. | 1.00  | n.s. | <b>24.62</b>   | <b>s.</b>  | 43.93  | s.   |
| spd_1613  <br>spd_rs08525 | <i>galT-1</i> | galactose-1-<br>phosphate<br>uridylyltransferase<br>(EC:2.7.7.12)       | N/A     | N/A  | N/A   | N/A  | <b>N/A</b>     | <b>on</b>  | N/A    | on   |
| spd_1617  <br>spd_rs08545 | namex<br>1702 | cell wall surface<br>anchor family protein                              | N/A     | N/A  | N/A   | N/A  | <b>N/A</b>     | <b>on</b>  | N/A    | on   |
| spd_1628  <br>spd_rs08605 | <i>xpt</i>    | xanthine phospho-<br>ribosyltransferase<br>(EC:2.4.2.22)                | -1.55   | n.s. | 1.11  | n.s. | <b>-2.41</b>   | <b>s.</b>  | -1.47  | n.s. |
| spd_1667  <br>spd_rs08820 | <i>amiF</i>   | oligopeptide ABC<br>transporter ATP-<br>binding protein AmiF            | -1.53   | s.   | -1.50 | s.   | <b>-1.59</b>   | <b>s.</b>  | -1.27  | s.   |
| spd_1668  <br>spd_rs08825 | <i>amiE</i>   | oligopeptide ABC<br>transporter ATP-<br>binding protein AmiE            | -1.82   | s.   | -1.95 | s.   | <b>-1.92</b>   | <b>s.</b>  | -1.74  | s.   |
| spd_1669  <br>spd_rs08830 | <i>amiD</i>   | oligopeptide ABC<br>transporter permease<br>AmiD                        | -2.92   | s.   | -2.93 | s.   | <b>-2.04</b>   | <b>s.</b>  | -1.97  | s.   |
| spd_1670  <br>spd_rs08835 | <i>amiC</i>   | oligopeptide ABC<br>transporter permease<br>AmiC                        | -2.83   | s.   | -3.16 | s.   | <b>-2.42</b>   | <b>s.</b>  | -2.43  | s.   |
| spd_1671  <br>spd_rs08840 | <i>amiA</i>   | oligopeptide ABC<br>transporter<br>oligopeptide-binding<br>protein AmiA | -959.64 | N/A  | N/A   | off  | <b>-2036.0</b> | <b>off</b> | N/A    | off  |
| spd_1874  <br>spd_rs09880 | namex<br>1969 | LysM domain-<br>containing protein                                      | 1.19    | n.s. | -1.00 | n.s. | <b>1.63</b>    | <b>s.</b>  | 1.13   | n.s. |

<sup>a</sup> significance level or on-off effect (s. – significant with  $p \leq 0.05$ ; n.s. – not significant with  $p > 0.05$ ; N/A – p-value not available; on – on-off effect: quantified only in mutant; off – on-off effect: not quantified in mutant)  
Because of missing intensity values in the proteomics data set, not all fold change values could be calculated. Those are indicated by „N/A“.

**d.** Regulated proteins (n=50) in the comparison of *S.p.* D39 $\Delta$ *aliB* strain and *S.p.* D39 wild-type strain in mid-exponential growth phase.

| identifier             | gene              | description                                                                                             | $\Delta$ <i>comDE</i> vs. wt |                    |                       |                    | $\Delta$ <i>aliB</i> vs. wt |                    |                       |                    |
|------------------------|-------------------|---------------------------------------------------------------------------------------------------------|------------------------------|--------------------|-----------------------|--------------------|-----------------------------|--------------------|-----------------------|--------------------|
|                        |                   |                                                                                                         | early exp. growth phase      |                    | mid-exp. growth phase |                    | early exp. growth phase     |                    | mid-exp. growth phase |                    |
|                        |                   |                                                                                                         | fold change                  | sign. <sup>a</sup> | fold change           | sign. <sup>a</sup> | fold change                 | sign. <sup>a</sup> | fold change           | sign. <sup>a</sup> |
| spd_0005   spd_rs00025 | <i>pth</i>        | peptidyl-tRNA hydrolase (EC:3.1.1.29)                                                                   | N/A                          | N/A                | N/A                   | N/A                | N/A                         | N/A                | N/A                   | on                 |
| spd_0109   spd_rs00570 | <i>namex 114</i>  | amino acid ABC transporter periplasmic amino acid-binding protein                                       | N/A                          | N/A                | N/A                   | N/A                | 363.52                      | on                 | N/A                   | on                 |
| spd_0110   spd_rs00575 | <i>argG</i>       | argininosuccinate synthase (EC:6.3.4.5)                                                                 | N/A                          | N/A                | N/A                   | N/A                | N/A                         | on                 | N/A                   | on                 |
| spd_0111   spd_rs00580 | <i>argH</i>       | argininosuccinate lyase (EC:4.3.2.1)                                                                    | N/A                          | N/A                | N/A                   | N/A                | N/A                         | on                 | N/A                   | on                 |
| spd_0115   spd_rs00605 | <i>namex 121</i>  | hypothetical protein                                                                                    | -2.70                        | off                | 1.01                  | n.s.               | N/A                         | off                | N/A                   | off                |
| spd_0200   spd_rs01080 | <i>rplP</i>       | 5S ribosomal protein L16                                                                                | 1.23                         | n.s.               | -1.09                 | n.s.               | 1.01                        | n.s.               | <b>1.63</b>           | <b>s.</b>          |
| spd_0235   spd_rs01260 | <i>pfl</i>        | pyruvate formate-lyase (EC:2.3.1.54)                                                                    | 1.22                         | N/A                | N/A                   | N/A                | N/A                         | N/A                | N/A                   | on                 |
| spd_0251   spd_rs01345 | <i>rpsL</i>       | 3S ribosomal protein S12                                                                                | -1.03                        | n.s.               | -1.05                 | n.s.               | 1.14                        | n.s.               | <b>1.89</b>           | <b>s.</b>          |
| spd_0308   spd_rs01645 | <i>clpL</i>       | ATP-dependent Clp protease, ATP-binding subunit                                                         | 1.69                         | s.                 | 1.54                  | s.                 | 1.76                        | s.                 | <b>2.72</b>           | <b>s.</b>          |
| spd_0322   spd_rs01715 | <i>cps2G</i>      | glycoside hydrolase family protein (EC:2.4.1.-)                                                         | -1.05                        | n.s.               | 1.00                  | n.s.               | -1.15                       | n.s.               | <b>1.51</b>           | <b>s.</b>          |
| spd_0402   spd_rs02140 | <i>namex 427</i>  | hypothetical protein                                                                                    | 1.09                         | N/A                | 1.41                  | n.s.               | -1.43                       | N/A                | <b>2.39</b>           | <b>s.</b>          |
| spd_0430   spd_rs02290 | <i>trkA</i>       | potassium transporter peripheral membrane protein                                                       | N/A                          | N/A                | -1.07                 | n.s.               | N/A                         | N/A                | <b>1.68</b>           | <b>s.</b>          |
| spd_0453   spd_rs02405 | <i>hsdS</i>       | type I restriction-modification system subunit S                                                        | N/A                          | N/A                | 1.25                  | n.s.               | -1.41                       | N/A                | <b>2.13</b>           | <b>s.</b>          |
| spd_0466   spd_rs02480 | <i>namex 495</i>  | hypothetical protein                                                                                    | N/A                          | N/A                | N/A                   | N/A                | N/A                         | N/A                | N/A                   | on                 |
| spd_0587   spd_rs03145 | <i>namex 627</i>  | short chain dehydrogenase/reductase family oxidoreductase                                               | N/A                          | N/A                | -1.07                 | n.s.               | N/A                         | N/A                | <b>1.60</b>           | <b>s.</b>          |
| spd_0661   spd_rs03520 | <i>exp5</i>       | PTS system transporter subunit IIABC (EC:2.7.1.69)                                                      | 1.02                         | n.s.               | -1.72                 | n.s.               | 2.14                        | s.                 | <b>2.39</b>           | <b>s.</b>          |
| spd_0697   spd_rs03695 | <i>namex 736</i>  | GNAT family acetyltransferase                                                                           | N/A                          | N/A                | N/A                   | on                 | N/A                         | N/A                | N/A                   | on                 |
| spd_0719   spd_rs03805 | <i>namex 758</i>  | amino acid ABC transporter permease                                                                     | 1.04                         | n.s.               | -1.29                 | n.s.               | 1.91                        | s.                 | <b>1.76</b>           | <b>s.</b>          |
| spd_0721   spd_rs03815 | <i>folD</i>       | bifunctional 5,1-methylene-tetrahydrofolate dehydrogenase/5,1-methylene-tetrahydrofolate cyclohydrolase | -1.08                        | n.s.               | -1.13                 | n.s.               | 1.76                        | s.                 | <b>1.82</b>           | <b>s.</b>          |
| spd_0814   spd_rs04325 | <i>namex 861</i>  | agmatine deiminase (EC:3.5.3.12)                                                                        | N/A                          | N/A                | N/A                   | N/A                | -1.08                       | N/A                | N/A                   | on                 |
| spd_0960   spd_rs05115 | <i>cpoA</i>       | glycosyl transferase CpoA (EC:2.4.1.-)                                                                  | N/A                          | N/A                | 1.52                  | n.s.               | N/A                         | N/A                | <b>1.63</b>           | <b>s.</b>          |
| spd_0968   spd_rs05165 | <i>namex 1029</i> | GNAT family acetyltransferase                                                                           | N/A                          | N/A                | N/A                   | N/A                | N/A                         | N/A                | N/A                   | on                 |
| spd_1020   spd_rs05435 | <i>rnhB</i>       | ribonuclease HII (EC:3.1.26.4)                                                                          | N/A                          | N/A                | N/A                   | N/A                | N/A                         | N/A                | N/A                   | on                 |
| spd_1171   spd_rs06190 | <i>namex 1233</i> | hypothetical protein                                                                                    | N/A                          | N/A                | N/A                   | N/A                | N/A                         | N/A                | N/A                   | on                 |
| spd_1194   spd_rs06305 | <i>thrB</i>       | homoserine kinase (EC:2.7.1.39)                                                                         | 1.17                         | n.s.               | 1.10                  | n.s.               | 1.01                        | n.s.               | <b>1.66</b>           | <b>s.</b>          |

|                           |               |                                                                         |         |      |       |      |         |      |               |            |
|---------------------------|---------------|-------------------------------------------------------------------------|---------|------|-------|------|---------|------|---------------|------------|
| spd_1226  <br>spd_rs06470 | namex<br>1289 | amino acid ABC<br>transporter amino<br>acid-binding protein             | -1.07   | n.s. | -1.18 | n.s. | 4.50    | s.   | <b>3.73</b>   | <b>s.</b>  |
| spd_1245  <br>spd_rs06565 | <i>rpsU</i>   | 3S ribosomal protein<br>S21                                             | 1.10    | n.s. | 1.18  | n.s. | 1.10    | n.s. | <b>1.61</b>   | <b>s.</b>  |
| spd_1311  <br>spd_rs06890 | namex<br>1373 | oxidoreductase,<br>Gfo/Ihd/MocA family<br>protein                       | 1.24    | n.s. | 1.14  | n.s. | 1.13    | n.s. | <b>1.72</b>   | <b>s.</b>  |
| spd_1349  <br>spd_rs07095 | <i>murC</i>   | UDP-N-<br>acetylmuramate--L-<br>alanine ligase<br>(EC:6.3.2.8)          | 1.03    | n.s. | 1.16  | n.s. | -1.04   | n.s. | <b>1.55</b>   | <b>s.</b>  |
| spd_1357  <br>spd_rs07140 | <i>aliB</i>   | oligopeptide ABC<br>transporter<br>oligopeptide-binding<br>protein AliB | -1.11   | n.s. | -1.06 | n.s. | N/A     | off  | <b>N/A</b>    | <b>off</b> |
| spd_1439  <br>spd_rs07580 | <i>rpsO</i>   | 3S ribosomal protein<br>S15                                             | 1.46    | n.s. | 1.49  | n.s. | -1.05   | n.s. | <b>5.08</b>   | <b>s.</b>  |
| spd_1514  <br>spd_rs07985 | namex<br>1591 | ABC transporter ATP-<br>binding protein                                 | N/A     | N/A  | -1.09 | n.s. | N/A     | N/A  | <b>N/A</b>    | <b>off</b> |
| spd_1516  <br>spd_rs07995 | namex<br>1593 | hypothetical protein                                                    | N/A     | N/A  | -1.52 | N/A  | N/A     | N/A  | <b>N/A</b>    | <b>off</b> |
| spd_1559  <br>spd_rs08230 | namex<br>1640 | GTP-binding protein<br>YqeH                                             | 1.13    | n.s. | 1.11  | n.s. | -1.06   | n.s. | <b>1.73</b>   | <b>s.</b>  |
| spd_1607  <br>spd_rs08500 | namex<br>1693 | ABC transporter<br>permease                                             | N/A     | N/A  | N/A   | N/A  | N/A     | on   | <b>N/A</b>    | <b>on</b>  |
| spd_1608  <br>spd_rs08505 | namex<br>1694 | ABC transporter ATP-<br>binding protein                                 | 1.22    | n.s. | -1.07 | n.s. | 32.20   | s.   | <b>54.44</b>  | <b>s.</b>  |
| spd_1609  <br>spd_rs08510 | namex<br>1695 | ABC transporter<br>substrate-binding<br>protein                         | 1.54    | n.s. | 1.17  | n.s. | 38.40   | s.   | <b>107.54</b> | <b>s.</b>  |
| spd_1610  <br>spd_rs08515 | namex<br>1696 | hypothetical protein                                                    | 1.37    | n.s. | 1.00  | n.s. | 24.62   | s.   | <b>43.93</b>  | <b>s.</b>  |
| spd_1613  <br>spd_rs08525 | <i>galT-1</i> | galactose-1-<br>phosphate<br>uridylyltransferase<br>(EC:2.7.7.12)       | N/A     | N/A  | N/A   | N/A  | N/A     | on   | <b>N/A</b>    | <b>on</b>  |
| spd_1617  <br>spd_rs08545 | namex<br>1702 | cell wall surface<br>anchor family protein                              | N/A     | N/A  | N/A   | N/A  | N/A     | on   | <b>N/A</b>    | <b>on</b>  |
| spd_1658  <br>spd_rs08770 | namex<br>1747 | hypothetical protein                                                    | N/A     | N/A  | N/A   | N/A  | N/A     | N/A  | <b>N/A</b>    | <b>on</b>  |
| spd_1668  <br>spd_rs08825 | <i>amiE</i>   | oligopeptide ABC<br>transporter ATP-<br>binding protein AmiE            | -1.82   | s.   | -1.95 | s.   | -1.92   | s.   | <b>-1.74</b>  | <b>s.</b>  |
| spd_1669  <br>spd_rs08830 | <i>amiD</i>   | oligopeptide ABC<br>transporter permease<br>AmiD                        | -2.92   | s.   | -2.93 | s.   | -2.04   | s.   | <b>-1.97</b>  | <b>s.</b>  |
| spd_1670  <br>spd_rs08835 | <i>amiC</i>   | oligopeptide ABC<br>transporter permease<br>AmiC                        | -2.83   | s.   | -3.16 | s.   | -2.42   | s.   | <b>-2.43</b>  | <b>s.</b>  |
| spd_1671  <br>spd_rs08840 | <i>amiA</i>   | oligopeptide ABC<br>transporter<br>oligopeptide-binding<br>protein AmiA | -959.64 | N/A  | N/A   | off  | -2036.0 | off  | <b>N/A</b>    | <b>off</b> |
| spd_1729  <br>spd_rs09140 | namex<br>1821 | hypothetical protein                                                    | 1.23    | s.   | 1.03  | n.s. | -1.04   | n.s. | <b>1.78</b>   | <b>s.</b>  |
| spd_1745  <br>spd_rs09230 | namex<br>1839 | transcriptional<br>regulator PlcR                                       | N/A     | N/A  | N/A   | N/A  | N/A     | N/A  | <b>N/A</b>    | <b>on</b>  |
| spd_1784  <br>spd_rs09430 | namex<br>1879 | ABC transporter ATP-<br>binding protein                                 | -1.70   | N/A  | N/A   | N/A  | -1.86   | N/A  | <b>N/A</b>    | <b>on</b>  |
| spd_1943  <br>spd_rs10230 | namex<br>2038 | hypothetical protein                                                    | 1.25    | N/A  | -1.03 | N/A  | 1.32    | N/A  | <b>1.70</b>   | <b>s.</b>  |
| spd_2025  <br>spd_rs10630 | namex<br>2118 | ABC transporter<br>substrate-binding<br>protein                         | -1.01   | n.s. | 1.13  | n.s. | -1.14   | n.s. | <b>1.60</b>   | <b>s.</b>  |
| spd_2025  <br>spd_rs10630 | namex<br>2118 | ABC transporter<br>substrate-binding<br>protein                         | -1.01   | n.s. | 1.13  | n.s. | -1.14   | n.s. | <b>1.60</b>   | <b>s.</b>  |

<sup>a</sup> significance level or on-off effect (s. – significant with  $p \leq 0.05$ ; n.s. – not significant with  $p > 0.05$ ; N/A – p-value not available; on – on-off effect: quantified only in mutant; off – on-off effect: not quantified in mutant)

Because of missing intensity values in the proteomics data set, not all fold change values could be calculated. Those are indicated by „N/A“.
