# Supplementary material for: In vivo proteomics identifies the competence regulon and AliB oligopeptide transporter as pathogenic factors in pneumococcal meningitis
Source: PubMed Central journal article supplement (PMC6687184; doi:10.1371/journal.ppat.1007987), 2019-07-29
Supplement: ppat.1007987.s006.pdf [file ppat.1007987.s006.pdf]

**Table S3** Primer list

| primer purpose                        | primer                                      | sequence (5'-3')                                                                |
|---------------------------------------|---------------------------------------------|---------------------------------------------------------------------------------|
| <b>mutagenesis</b>                    |                                             |                                                                                 |
| amplification of aliB                 | aliB_1276                                   | 5' -GCGT <b>GCTAGCT</b> CAAAAACCTATAACTATGTT- 3'                                |
|                                       | aliB_1277                                   | 5' -GCGC <b>GAGCTC</b> TTATTTGACATGTTTTGCC- 3'                                  |
| amplification of comDE                | comDE_1224                                  | 5' -GGGATTCCTACCATAAATAGAAAATTGACTTT- 3'                                        |
|                                       | comDE_1225                                  | 5' -GATATGATTGAGCACTATCAAAGCAAGCTATTCC- 3'                                      |
|                                       | comC_fwd                                    | 5' - <u>GCTAAGTTTGAAATGATTGAGTTATCAGATG</u> -3'                                 |
|                                       | comD_kan_rev2                               | 5'-CCATTTCTCTGGAATAGGCGTCGACGCG <u>CCCAAATC</u><br><u>CAAATAAATCCATTAC</u> -3'  |
|                                       | comD_kan_fwd2                               | 5'- <u>GTAATGGATTTATTTGGATTTGGGCGCGTCGACGCCTA</u><br><u>TTCCAGAGGAAATGG</u> -3' |
|                                       | comE_kan_fwd2                               | 5'-CCGCAACTGTCCATACTCTGATGGGATATTTTAGAG<br><u>AAAAAATCTC</u> -3'                |
|                                       | comE_kan_rev2                               | 5'- <u>GAGATTTTTCTCTAAAATATCCCATCAGAGTAT</u><br><u>GGACAGTTGCGG</u> -3'         |
| comE_rev                              | 5'- <u>GTTTACAAGGAGGAAATATGCAAGAAAG</u> -3' |                                                                                 |
| <b>recombinant protein production</b> |                                             |                                                                                 |
| spd_1357 (D39)                        | aliB_1288                                   | 5' -GCGT <b>GCTAGCG</b> GAAATCTAGCACTGCATC-3'                                   |
| sp_1923 (TIGR4)                       | aliB_1277                                   | 5' -GCGC <b>GAGCTC</b> TTATTTGACATGTTTTGCC-3'                                   |
|                                       | ply_370                                     | 5'-CG <b>GATCC</b> GCAAATAAAGCAGTAAATGAC-3                                      |
|                                       | ply_371                                     | 5'-CG <b>GATACC</b> CTAGTCATTTCTACCTGAG-3'                                      |

Restriction sites are **bold**; pneumococcal sequences for overlap PCR are underlined. ply: pneumolysin
