# Supplementary material for: In vivo proteomics identifies the competence regulon and AliB oligopeptide transporter as pathogenic factors in pneumococcal meningitis
Source: PubMed Central journal article supplement (PMC6687184; doi:10.1371/journal.ppat.1007987), 2019-07-29
Supplement: ppat.1007987.s007.pdf [file ppat.1007987.s007.pdf]

**Table S4** LC-MS/MS settings for analysis of samples of *in vitro* cultivated *S. pneumoniae* D39 wild-type and *S.p.* D39 $\Delta$ *comDE* and *S.p.* D39 $\Delta$ *aliB* mutants.

**a.** reversed phase liquid chromatography (RPLC)

|                         |                                                                                                                                                                                                                                                                                                                          |
|-------------------------|--------------------------------------------------------------------------------------------------------------------------------------------------------------------------------------------------------------------------------------------------------------------------------------------------------------------------|
| instrument              | Ultimate 3000 RSLC (Dionex, Idstein, Germany)                                                                                                                                                                                                                                                                            |
| trap column             | 75 $\mu$ m inner diameter, packed with 3 $\mu$ m C18 particles (Acclaim PepMap100, Thermo Scientific)                                                                                                                                                                                                                    |
| analytical column       | Accucore 150-C18, (Thermo Fisher Scientific), 25 cm x 75 $\mu$ m, 2.6 $\mu$ m C18 particles, 150 Å pore size                                                                                                                                                                                                             |
| buffer system           | binary buffer system consisting of 0.1% acetic acid (buffer A) and 0.1% acetic acid in 100% ACN in (buffer B)                                                                                                                                                                                                            |
| flow rate               | 300 nl/min                                                                                                                                                                                                                                                                                                               |
| gradient                | linear gradient of buffer B from 5% up to 25%<br>1 – 2 min: increase from 2% to 5%<br>2 – 10 min: 5%<br>10 – 130 min: increase from 5% to 25%<br>130 – 135 min: increase from 25% to 40%<br>135 – 137 min: increase from 40% to 90%<br>137 – 142 min: 90%<br>142 – 145 min: decrease from 90% to 2%<br>145 – 160 min: 2% |
| gradient duration       | 120 min (in total 160 min)                                                                                                                                                                                                                                                                                               |
| column oven temperature | 40°C                                                                                                                                                                                                                                                                                                                     |

**b.** mass spectrometry (MS)

|                                           |                                                                             |
|-------------------------------------------|-----------------------------------------------------------------------------|
| instrument                                | Q Exactive mass spectrometer (Thermo Scientific)                            |
| electrospray                              | via TriVersa NanoMate (Advion Biosciences, Norwich, UK)                     |
| operation mode                            | data-dependent                                                              |
| <b>full MS</b> resolution                 | 70,000                                                                      |
| <b>full MS</b> AGC target                 | 3e6                                                                         |
| <b>full MS</b> maximum ion injection time | 120 ms                                                                      |
| <b>full MS</b> scan range                 | 300 to 1,650 m/z                                                            |
| <b>dd-MS2</b> resolution                  | 17,500                                                                      |
| <b>dd-MS2</b> AGC target                  | 2e5                                                                         |
| <b>dd-MS2</b> selection for MS/MS         | 10 most abundant isotope patterns with charge $\geq$ 2 from the survey scan |
| <b>dd-MS2</b> maximum ion injection time  | 120 ms                                                                      |
| isolation window                          | 3 m/z                                                                       |
| dissociation mode                         | higher energy collisional dissociation (HCD)                                |
| normalized collision energy               | 27.5%                                                                       |
| dynamic exclusion                         | 30 s                                                                        |
| MS/MS operation mode                      | centroid mode, peptide match: preferred                                     |
| charge exclusion                          | 1, > 6                                                                      |
